# Supplementary material
Source: publisher site journal article supplement (https://www.dovepress.com/article/322506)
Supplement: Supplementary file 1 [file get_supplementary_file.php]

assay[tiab] OR intraassay[tiab] OR intra-assay[tiab] OR interindividual[tiab] OR inter-individual[tiab] OR intraindividual[tiab] OR intra-individual[tiab] OR interparticipant[tiab] OR inter-participant[tiab] OR intraparticipant[tiab] OR intra-participant[tiab] OR kappa[tiab] OR kappa's[tiab] OR kappas[tiab] OR repeatab\* [tiab] OR ((replicab\* [tiab] OR repeated[tiab]) AND (measure[tiab] OR measures[tiab] OR findings[tiab] OR result[tiab] OR results[tiab] OR test[tiab] OR tests[tiab])) OR generaliza\* [tiab] OR generalisa\* [tiab] OR concordance[tiab] OR (intraclass[tiab] AND correlation\* [tiab]) OR discriminative[tiab] OR "known group"[tiab] OR factor analysis[tiab] OR factor analyses[tiab] OR dimension\* [tiab] OR subscale\* [tiab] OR (multitrait[tiab] AND scaling[tiab] AND (analysis[tiab] OR analyses[tiab])) OR item discriminant[tiab] OR inter scale correlation\* [tiab] OR error[tiab] OR errors[tiab] OR "individual variability"[tiab] OR (variability[tiab] AND (analysis[tiab] OR values[tiab])) OR (uncertainty[tiab] AND (measurement[tiab] OR measuring[tiab])) OR "standard error of measurement"[tiab] OR sensitiv\* [tiab] OR responsive\* [tiab] OR ((minimal[tiab] OR minimally[tiab] OR clinical[tiab] OR clinically[tiab]) AND (important[tiab] OR significant[tiab] OR detectable[tiab]) AND (change[tiab] OR difference[tiab])) OR (small\* [tiab] AND (real[tiab] OR detectable[tiab]) AND (change[tiab] OR difference[tiab])) OR meaningful change[tiab] OR "ceiling effect"[tiab] OR "floor effect"[tiab] OR "Item response model"[tiab] OR IRT[tiab] OR Rasch[tiab] OR "Differential item functioning"[tiab] OR DIF[tiab] OR "computer adaptive testing"[tiab] OR "item bank"[tiab] OR "cross-cultural equivalence"[tiab])) NOT (((((((((((((((((((("addresses"[Publication Type]) OR "biography"[Publication Type]) OR "case reports"[Publication Type]) OR "comment"[Publication Type]) OR "directory"[Publication Type]) OR "editorial"[Publication Type]) OR "festschrift"[Publication Type]) OR "interview"[Publication Type]) OR "lectures"[Publication Type]) OR "legal cases"[Publication Type]) OR "legislation"[Publication Type]) OR "letter"[Publication Type]) OR "news"[Publication Type]) OR "newspaper article"[Publication Type]) OR "patient education handout"[Publication Type]) OR "popular works"[Publication Type]) OR "congresses"[Publication Type]) OR "consensus development conference"[Publication Type]) OR "consensus development conference, nih"[Publication Type]) OR "practice guideline"[Publication Type]) NOT (("animals"[MeSH Terms] NOT "humans"[MeSH Terms]))))
