# Supplementary material
Source: publisher site journal article supplement (https://www.dovepress.com/article/322506)
Supplement: Supplementary file 2 [file get_supplementary_file.php]

### Supplementary Material 3: Detailed PubMed search strategy

((((((((((((((((((accidental falls[MeSH Terms]) OR fall[tiab]) OR falls[tiab]) OR falling[tiab]) OR faller[tiab]) OR stumble[tiab]) OR stumbling[tiab]) OR trip[tiab]) OR tripping[tiab]) OR slip[tiab]) OR slipping[tiab])) AND (((((((((((((((((((("Aged"[Mesh]) OR ("Aged, 80 and over"[Mesh]) OR "Frail Elderly"[Mesh]) OR "Geriatrics"[Mesh]) OR elder\*[tiab]) OR eldest[tiab]) OR frail\*[tiab]) OR geriatri\*[tiab]) OR old\*[tiab]) OR old age\*[tiab]) OR oldest old\*[tiab]) OR senior\*[tiab]) OR senium[tiab]) OR very old\*[tiab]) OR septuagenarian\*[tiab]) OR octagenarian\*[tiab]) OR octogenarian\*[tiab]) OR nonagenarian\*[tiab]) OR centarian\*[tiab]) OR centenarian\*[tiab]) OR supercentenarian\*[tiab]) OR older people[tiab]) OR older subject\*[tiab]) OR older patient\*[tiab]) OR older age\*[tiab]) OR older adult\*[tiab]) OR older man[tiab]) OR older men[tiab]) OR older male\*[tiab]) OR older woman[tiab]) OR older women[tiab]) OR older female\*[tiab]) OR older population\*[tiab]) OR older person\*[tiab])) AND (((((((((((((((((((timed up[tiab] AND go[tiab])) OR timed up and go[tiab]) OR (time up[tiab] AND go[tiab])) OR (get up and go[tiab])) OR TUG[tiab]) OR GUG[tiab]) OR TGUG[tiab]) OR TGUGT[tiab]) OR ETGUG[tiab]) OR TUGT[tiab]) OR TGUGM[tiab])) OR (((Mini-BESTest[tiab]) OR MiniBESTest[tiab]) OR BESTest[tiab]) OR balance evaluation system\*[tiab])) OR ((berg balance[tiab]) OR BBS[tiab])) OR ((short physical performance[tiab]) AND SPPB[tiab])) OR (((performance oriented mobility assessment[tiab]) OR POMA[tiab]) OR tinetti[tiab])) OR (((((((((((((((((((Walking Speed[Mesh]) OR walking speed\*[tiab]) OR walking velocit\*[tiab]) OR walking pace\*[tiab]) OR gait speed\*[tiab]) OR gait characteristics[tiab]) OR gait velocit\*[tiab]) OR ambulation speed\*[tiab]) OR spatio temporal parameter\*[tiab]) OR spatiotemporal parameter\*[tiab])) OR (((((((single leg\*[tiab]) OR SLS[tiab]) OR one leg\*[tiab]) OR single limb\*[tiab]) OR OLS[tiab]) OR OLST[tiab])) OR (((forward reach\*[tiab]) OR functional reach\*[tiab]) OR FRT[tiab])) OR (((((((grip strength\*[tiab]) OR grip force\*[tiab]) OR Hand Strength[Mesh]) OR hand strenght\*[tiab]) OR Pinch Strength[MeSH]) OR pinch strenght\*[tiab]) OR hand grip\*[tiab]) OR HGS[tiab])) OR (((((((((((((((((((abduction\*[tiab]) OR abductor\*[tiab]) OR adduction\*[tiab]) OR adductor\*[tiab]) OR ankle musc\*[tiab]) OR ankle strength\*[tiab]) OR calf[tiab]) OR eversion\*[tiab]) OR evertor\*[tiab]) OR extensor\*[tiab]) OR external rotator\*[tiab]) OR flexor\*[tiab]) OR foot musc\*[tiab]) OR foot strength\*[tiab]) OR gastrocnem\*[tiab]) OR glute\*[tiab]) OR Hamstring Muscles[Mesh]) OR hamstring\*[tiab]) OR hip musc\*[tiab]) OR hip strength\*[tiab]) OR internal rotator\*[tiab]) OR inversion\*[tiab]) OR invertor\*[tiab]) OR knee musc\*[tiab]) OR knee strength\*[tiab]) OR leg force\*[tiab]) OR leg strength\*[tiab]) OR lower extremity force\*[tiab]) OR lower extremity strength\*[tiab]) OR Lower limb strength\*[tiab]) OR perone\*[tiab]) OR quadricep\*[tiab]) OR soleus[tiab]) OR tibial[tiab])))) AND ((instrumentation[sh] OR methods[sh] OR Validation Studies[pt] OR Comparative Study[pt] OR "psychometrics"[MeSH] OR psychometr\*[tiab] OR clinimetr\*[tw] OR clinometr\*[tw] OR "outcome assessment (health care)"[MeSH] OR outcome assessment[tiab] OR outcome measure\*[tw] OR "observer variation"[MeSH] OR observer variation[tiab] OR "Health Status Indicators"[Mesh] OR "reproducibility of results"[MeSH] OR reproducib\*[tiab] OR "discriminant analysis"[MeSH] OR reliab\*[tiab] OR unreliab\*[tiab] OR valid\*[tiab] OR coefficient[tiab] OR homogeneity[tiab] OR homogeneous[tiab] OR "internal consistency"[tiab] OR (cronbach\*[tiab] AND (alpha[tiab] OR alphas[tiab])) OR (item[tiab] AND (correlation\*[tiab] OR selection\*[tiab] OR reduction\*[tiab])) OR agreement[tiab] OR precision[tiab] OR imprecision[tiab] OR "precise values"[tiab] OR test-retest[tiab] OR (test[tiab] AND retest[tiab]) OR (reliab\*[tiab] AND (test[tiab] OR retest[tiab])) OR stability[tiab] OR interrater[tiab] OR inter-rater[tiab] OR intrarater[tiab] OR intra-rater[tiab] OR intertester[tiab] OR inter-tester[tiab] OR intratester[tiab] OR intra-tester[tiab] OR interobserver[tiab] OR inter-observer[tiab] OR intraobserver[tiab] OR intra-observer[tiab] OR intertechnician[tiab] OR inter-technician[tiab] OR intratechnician[tiab] OR intra-technician[tiab] OR interexaminer[tiab] OR inter-examiner[tiab] OR intraexaminer[tiab] OR intra-examiner[tiab] OR interassay[tiab] OR inter-

assay[tiab] OR intraassay[tiab] OR intra-assay[tiab] OR interindividual[tiab] OR inter-individual[tiab] OR intraindividual[tiab] OR intra-individual[tiab] OR interparticipant[tiab] OR inter-participant[tiab] OR intraparticipant[tiab] OR intra-participant[tiab] OR kappa[tiab] OR kappa's[tiab] OR kappas[tiab] OR repeatab[tiab] OR ((replicab[tiab] OR repeated[tiab]) AND (measure[tiab] OR measures[tiab] OR findings[tiab] OR result[tiab] OR results[tiab] OR test[tiab] OR tests[tiab])) OR generaliza\*[tiab] OR generalisa\*[tiab] OR concordance[tiab] OR (intraclass[tiab] AND correlation\*[tiab]) OR discriminative[tiab] OR "known group"[tiab] OR factor analysis[tiab] OR factor analyses[tiab] OR dimension\*[tiab] OR subscale\*[tiab] OR (multitrait[tiab] AND scaling[tiab] AND (analysis[tiab] OR analyses[tiab])) OR item discriminant[tiab] OR inter scale correlation\*[tiab] OR error[tiab] OR errors[tiab] OR "individual variability"[tiab] OR (variability[tiab] AND (analysis[tiab] OR values[tiab])) OR (uncertainty[tiab] AND (measurement[tiab] OR measuring[tiab])) OR "standard error of measurement"[tiab] OR sensitiv\*[tiab] OR responsive\*[tiab] OR ((minimal[tiab] OR minimally[tiab] OR clinical[tiab] OR clinically[tiab]) AND (important[tiab] OR significant[tiab] OR detectable[tiab]) AND (change[tiab] OR difference[tiab])) OR (small\*[tiab] AND (real[tiab] OR detectable[tiab]) AND (change[tiab] OR difference[tiab])) OR meaningful change[tiab] OR "ceiling effect"[tiab] OR "floor effect"[tiab] OR "Item response model"[tiab] OR IRT[tiab] OR Rasch[tiab] OR "Differential item functioning"[tiab] OR DIF[tiab] OR "computer adaptive testing"[tiab] OR "item bank"[tiab] OR "cross-cultural equivalence"[tiab])) NOT (((((((((((((((((((("addresses"[Publication Type]) OR "biography"[Publication Type]) OR "case reports"[Publication Type]) OR "comment"[Publication Type]) OR "directory"[Publication Type]) OR "editorial"[Publication Type]) OR "festschrift"[Publication Type]) OR "interview"[Publication Type]) OR "lectures"[Publication Type]) OR "legal cases"[Publication Type]) OR "legislation"[Publication Type]) OR "letter"[Publication Type]) OR "news"[Publication Type]) OR "newspaper article"[Publication Type]) OR "patient education handout"[Publication Type]) OR "popular works"[Publication Type]) OR "congresses"[Publication Type]) OR "consensus development conference"[Publication Type]) OR "consensus development conference, nih"[Publication Type]) OR "practice guideline"[Publication Type]) NOT (("animals"[MeSH Terms] NOT "humans"[MeSH Terms])))
